# Supplementary material for: A homospin cobalt(ii) topological ferrimagnet
Source: Royal Society of Chemistry journal article supplement (doi:10.1039/c3cc43642j), 2013-01-01
Supplement: c3cc43642j.pdf [file c3cc43642j.pdf]

# Electronic Supplementary Information

## A Homospin Cobalt(II) Topological Ferrimagnet

Ji-Yong Zou,<sup>a,b</sup> Wei Shi,<sup>\*a</sup> Na Xu,<sup>a</sup> Lei-Lei Li,<sup>a</sup> Jin-Kui Tang,<sup>c</sup> Hong-Ling Gao,<sup>b</sup> Jian-Zhong Cui<sup>b</sup> and Peng Cheng<sup>\*a</sup>

<sup>a</sup> Department of Chemistry, Key Laboratory of Advanced Energy Material Chemistry (MOE), and Tianjin Co-Innovation Center of Chemical Science and Engineering, Nankai University, Tianjin 300071, P. R. China.

<sup>b</sup> Department of Chemistry, Tianjin University, Tianjin 300072, P. R. China.

<sup>c</sup> State Key Laboratory of Rare Earth Resource Utilization, Changchun Institute of Applied Chemistry, Chinese Academy of Sciences, Changchun 130022, P. R. China.

|                                          |   |
|------------------------------------------|---|
| 1. Synthesis.....                        | 2 |
| 2. Crystallographic Studies.....         | 4 |
| 3. Thermogravimetric Analysis.....       | 5 |
| 4. Power X-Ray Diffraction.....          | 5 |
| 5. X-ray Photoelectron Spectroscopy..... | 6 |
| 6. Magnetic Data.....                    | 6 |
| 7. BVS Calculation.....                  | 8 |

## 1. Synthesis

**Materials and General Characterization.** H<sub>3</sub>TDA (H<sub>3</sub>TDA = 1*H*-1,2,3-triazole-4,5-dicarboxylic acid) was prepared according to literature.<sup>1</sup> All other reagents and solvents employed were commercially available and used as received without further purification. Elemental analyses for C, H and N were carried out on a Perkin–Elmer analyzer. Powder X-ray diffraction measurements were recorded on a D/Max-2500 X-ray diffractometer using Cu-K $\alpha$  radiation. FT-IR spectra were measured with a Bruker Tensor 27 Spectrometer on KBr disks. Thermogravimetric analysis (TGA) was carried out on a Delta Series TA-SDTQ600 analyzer in nitrogen atmosphere from room temperature to 800 °C (10 °C min<sup>-1</sup>) using aluminum crucibles. Magnetic susceptibility measurements were performed on a Quantum Design SQUID MPMS XL-7 magnetometer. Diamagnetic corrections were made for all the constituent atoms with Pascal's constants and the sample holders. X-ray Photoelectron Spectroscopy (XPS) was carried out on Axis Ultra DLD.

**Synthesis of {[H<sub>2</sub>N(CH<sub>3</sub>)<sub>2</sub>][Co<sub>3</sub>(TDA)<sub>2</sub>(TZ)(H<sub>2</sub>O)]·3.5H<sub>2</sub>O}<sub>n</sub> (1):** A mixture of Co(OAc)<sub>2</sub>·4H<sub>2</sub>O (0.0252 g, 0.1 mmol), H<sub>3</sub>TDA (0.0319 g, 0.2 mmol) and HTZ (0.0070 g, 0.1 mmol) (HTZ = 1*H*-1,2,4-triazole) was dissolved in H<sub>2</sub>O (3 mL) and DMF (3 mL). The pH of the solution was adjusted to 6.46 with 0.2 mol dm<sup>-3</sup> NaHCO<sub>3</sub> aqueous solution. The mixture was sealed in a 25 mL Teflon-lined stainless steel reactor heated at 90 °C for 72 h, and then cooled to room temperature at a speed of 1 °C h<sup>-1</sup>. Pink rhombic crystals of **1** in *ca.* 43% yield (based on Co) were obtained. Anal. calcd. Calcd for C<sub>12</sub>H<sub>19</sub>N<sub>10</sub>O<sub>12.5</sub>Co<sub>3</sub> (%): C, 21.19; H, 2.82; N,

20.59. Found (%): C, 21.36; H, 2.75; N, 20.64. IR (KBr,  $\text{cm}^{-1}$ ): 3436s, 3192s, 1680m, 1599vs, 1513m, 1412vs, 1372m, 1291s, 1225s, 1146s, 1070m, 991w, 831m, 703m, 661m.

## 2. Crystallographic Studies

Single-crystal X-ray diffraction measurement of **1** was recorded on an Oxford Supernova diffractometer with a graphite monochromatic *Mo-K $\alpha$*  radiation ( $\lambda = 0.71073 \text{ \AA}$ ). The structure was solved by direct method and refined by full-matrix least-squares techniques on  $F^2$  using the *SHELXS-97* and *SHELXS-97* programs.<sup>2</sup> Anisotropic thermal parameters were assigned to all non-hydrogen atoms. The hydrogen atoms were placed in idealized positions and located in the difference Fourier map. The formula was identified by combining single-crystal structure, element analysis and thermogravimetric analysis (Figure S1). The crystallographic data for **1** are listed in Table S1. Selected bond lengths and bond angles are listed in Table S2. CCDC 909522 for **1** contains the supplementary crystallographic data for this paper. The data can be obtained free of charge from the Cambridge Crystallographic Data Centre ([www.ccdc.cam.ac.uk/data\\_request/cif](http://www.ccdc.cam.ac.uk/data_request/cif)).

**Scheme S1.** Representation of H<sub>3</sub>TDA and HTZ and their coordination modes in **1**.

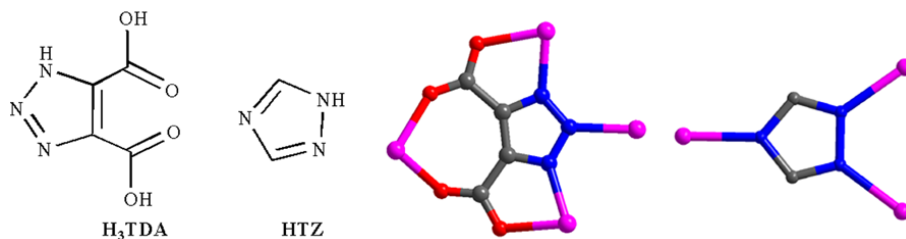

Table S1. Crystal data and structure refinements for **1**.

| compound                                                                           | <b>1</b>                                                                          |
|------------------------------------------------------------------------------------|-----------------------------------------------------------------------------------|
| formula                                                                            | C <sub>12</sub> H <sub>19</sub> N <sub>10</sub> O <sub>12.5</sub> Co <sub>3</sub> |
| formula weight                                                                     | 680.14                                                                            |
| crystal system                                                                     | orthorhombic                                                                      |
| space group                                                                        | <i>Fddd</i>                                                                       |
| <i>a</i> (Å)                                                                       | 15.6139(8)                                                                        |
| <i>b</i> (Å)                                                                       | 18.3439(11)                                                                       |
| <i>c</i> (Å)                                                                       | 34.336(3)                                                                         |
| $\alpha$ (°)                                                                       | 90                                                                                |
| $\beta$ (°)                                                                        | 90                                                                                |
| $\gamma$ (°)                                                                       | 90                                                                                |
| <i>V</i> (Å <sup>3</sup> )                                                         | 9834.5(11)                                                                        |
| <i>Z</i>                                                                           | 16                                                                                |
| <i>D<sub>c</sub></i> , g cm <sup>-3</sup>                                          | 1.829                                                                             |
| $\mu$ , mm <sup>-1</sup>                                                           | 2.079                                                                             |
| F(000)                                                                             | 5424                                                                              |
| GOF on <i>F</i> <sup>2</sup>                                                       | 1.127                                                                             |
| <i>R</i> <sub>int</sub>                                                            | 0.0486                                                                            |
| <i>R</i> <sub>1</sub> , <i>wR</i> <sub>2</sub> [ <i>I</i> > $\sigma$ ( <i>I</i> )] | 0.0490, 0.1473                                                                    |
| <i>R</i> <sub>1</sub> , <i>wR</i> <sub>2</sub> (all data)                          | 0.0694, 0.1574                                                                    |
| Residues (e Å <sup>-3</sup> )                                                      | 1.263/-0.410                                                                      |

Table S2. Selected bonds lengths (Å) and angles (°) for **1**.

| <b>1</b>                               |            |                                        |            |
|----------------------------------------|------------|----------------------------------------|------------|
| Co1—N1 <sup>#1</sup>                   | 2.048(5)   | N2—Co1—O4 <sup>#3</sup>                | 114.23(19) |
| Co1—N4 <sup>#2</sup>                   | 2.079(5)   | N1 <sup>#1</sup> —Co1—O2 <sup>#1</sup> | 75.40(17)  |
| Co1—N3 <sup>#3</sup>                   | 2.091(5)   | N4 <sup>#2</sup> —Co1—O2 <sup>#1</sup> | 85.68(18)  |
| Co1—N2                                 | 2.156(5)   | N3 <sup>#3</sup> —Co1—O2 <sup>#1</sup> | 110.28(17) |
| Co1—O4 <sup>#3</sup>                   | 2.230(4)   | N2—Co1—O2 <sup>#1</sup>                | 161.51(18) |
| Co1—O2 <sup>#1</sup>                   | 2.247(4)   | O4 <sup>#3</sup> —Co1—O2 <sup>#1</sup> | 77.93(17)  |
| Co2—N5                                 | 2.063(7)   | N5—Co2—O5                              | 180.0      |
| Co2—O5                                 | 2.063(7)   | N5—Co2—O3 <sup>#4</sup>                | 90.98(13)  |
| Co2—O3                                 | 2.085(4)   | O5—Co2—O3 <sup>#4</sup>                | 89.02(13)  |
| Co2—O3 <sup>#4</sup>                   | 2.085(4)   | N5—Co2—O3                              | 90.98(13)  |
| Co2—O1                                 | 2.155(4)   | O5—Co2—O3                              | 89.02(13)  |
| Co2—O1 <sup>#4</sup>                   | 2.155(4)   | O3 <sup>#4</sup> —Co2—O3               | 178.0(3)   |
| N1 <sup>#1</sup> —Co1—N4 <sup>#2</sup> | 115.3(2)   | N5—Co2—O1                              | 88.72(12)  |
| N1 <sup>#1</sup> —Co1—N3 <sup>#3</sup> | 154.9(2)   | O5—Co2—O1                              | 91.28(12)  |
| N4 <sup>#2</sup> —Co1—N3 <sup>#3</sup> | 89.7(2)    | O3 <sup>#4</sup> —Co2—O1               | 85.74(16)  |
| N1 <sup>#1</sup> —Co1—N2               | 91.41(17)  | O3—Co2—O1                              | 94.25(16)  |
| N4 <sup>#2</sup> —Co1—N2               | 88.5(2)    | N5—Co2—O1 <sup>#4</sup>                | 88.72(12)  |
| N3 <sup>#3</sup> —Co1—N2               | 87.14(18)  | O5—Co2—O1 <sup>#4</sup>                | 91.28(12)  |
| N1 <sup>#1</sup> —Co1—O4 <sup>#3</sup> | 84.56(17)  | O3 <sup>#4</sup> —Co2—O1 <sup>#4</sup> | 94.24(16)  |
| N4 <sup>#2</sup> —Co1—O4 <sup>#3</sup> | 150.20(18) | O3—Co2—O1 <sup>#4</sup>                | 85.80(16)  |
| N3 <sup>#3</sup> —Co1—O4 <sup>#3</sup> | 73.26(17)  | O1—Co2—O1 <sup>#4</sup>                | 177.4(2)   |

Symmetry transformations used to generate equivalent atoms:

#1  $-x+1,-y+1,-z+1$  #2  $x-1/4,-y+1,z-1/4$  #3  $-x+5/4,-y+5/4,z$  #4  $-x+7/4,-y+3/4,z$

### 3. Thermogravimetric Analysis

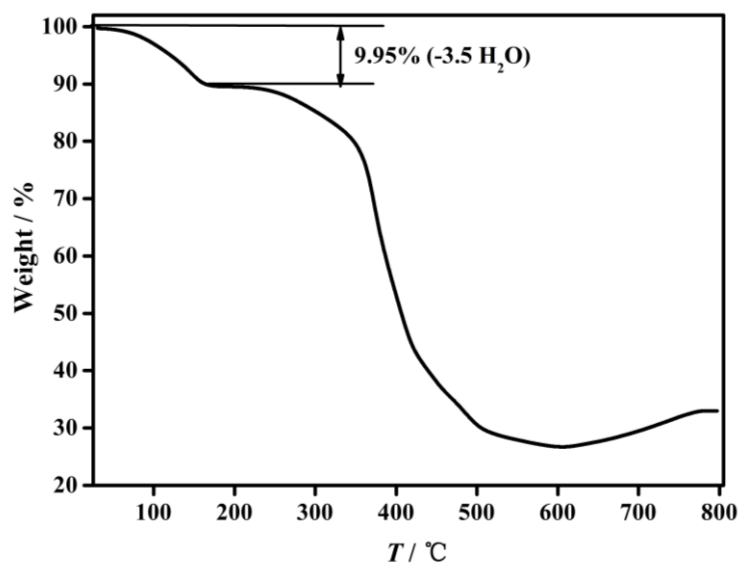

Fig. S1. The thermal gravimetric analysis (TGA) of **1**.

### 4. Power X-Ray Diffraction

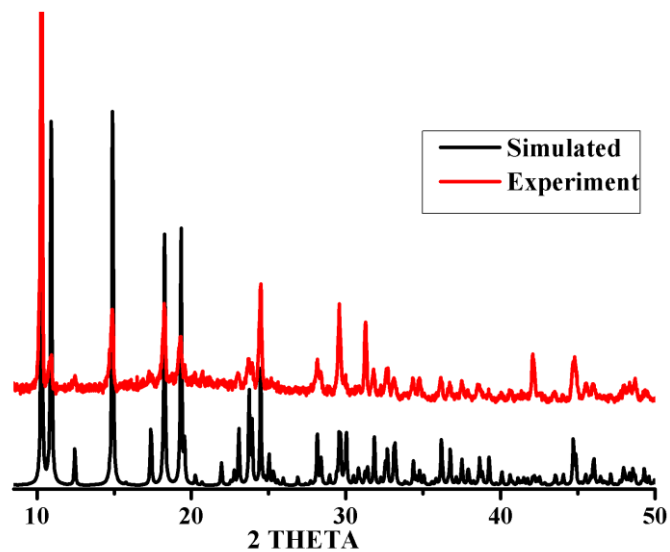

Fig. S2. Comparison of the experimental PXRD pattern of the as-synthesized **1** with the one simulated from its single crystal data.

## 5. X-ray Photoelectron Spectroscopy

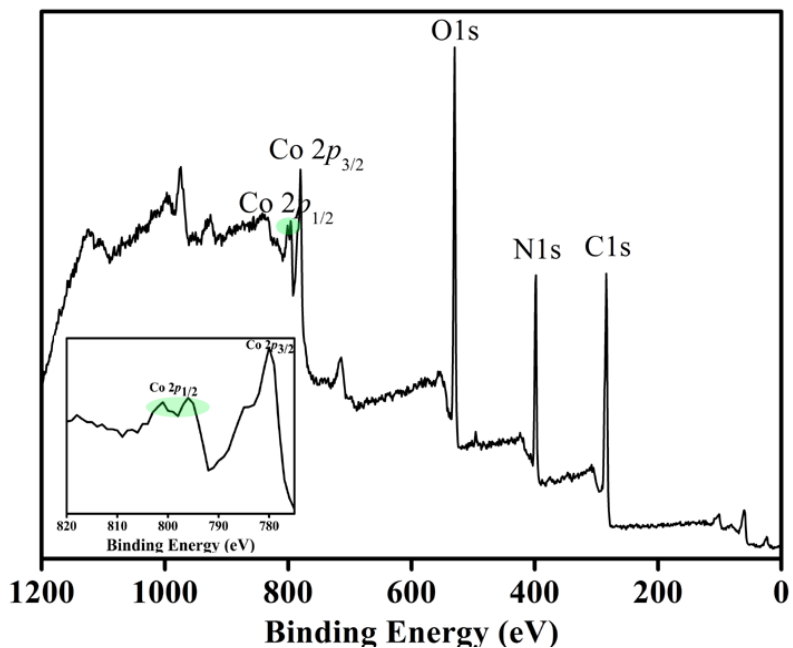

Fig. S3. X-ray photoelectron spectroscopy (XPS) of 1. Inset: XPS of the Co 2p level in 1.

## 6. Magnetic Data

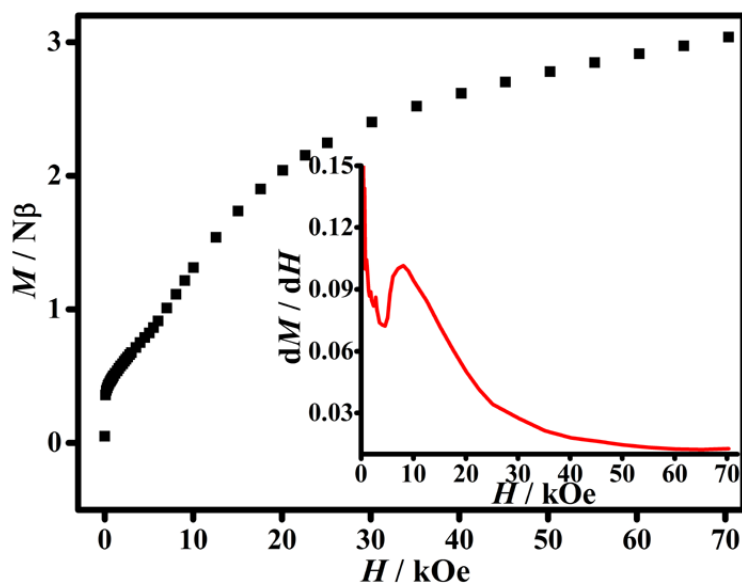

Fig. S4. Field dependence of magnetizations for 1 at 2 K. Inset: The plots of the  $dM / dH$  vs  $H$  at 2 K for 1.

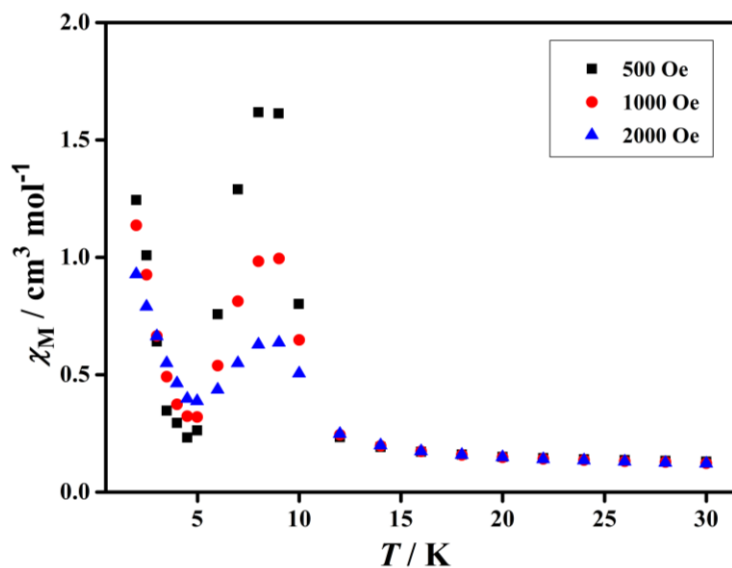

Fig. S5. Temperature dependence of magnetic susceptibilities of **1** in different applied dc field.

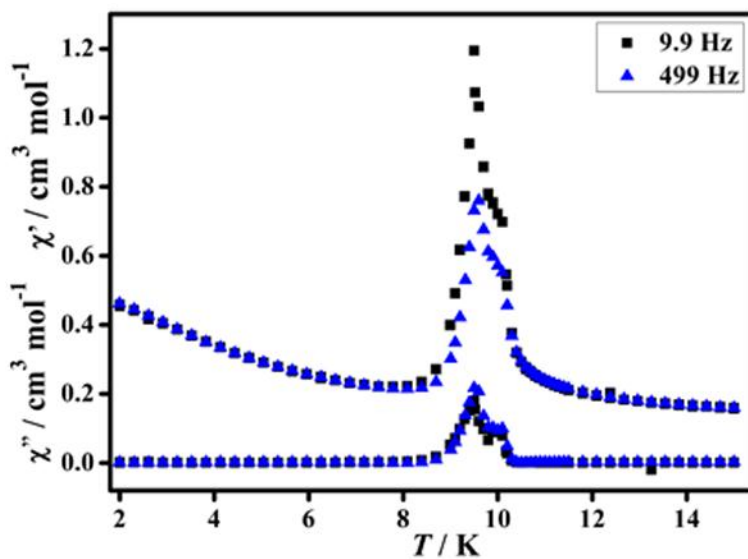

Fig. S6. The *ac* susceptibilities of **1** measured at 9.9 and 499 Hz under zero *dc* field.

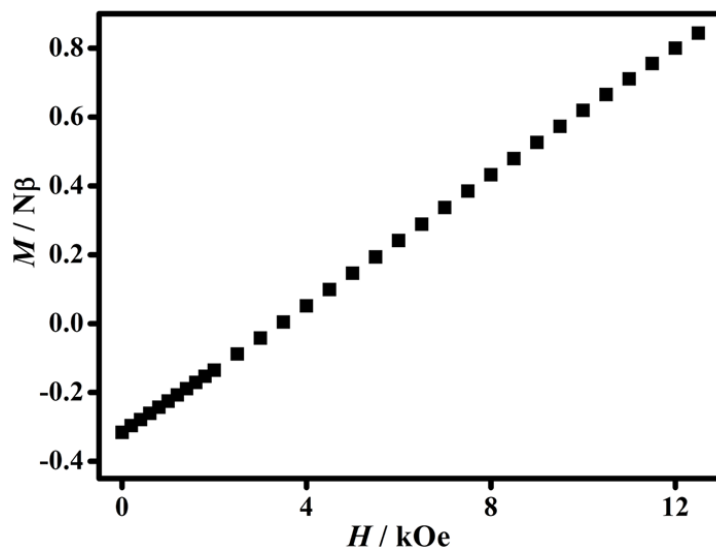

Fig. S7. Field dependence of magnetizations for **1** at 2 K after FC measurement in cooling mode.

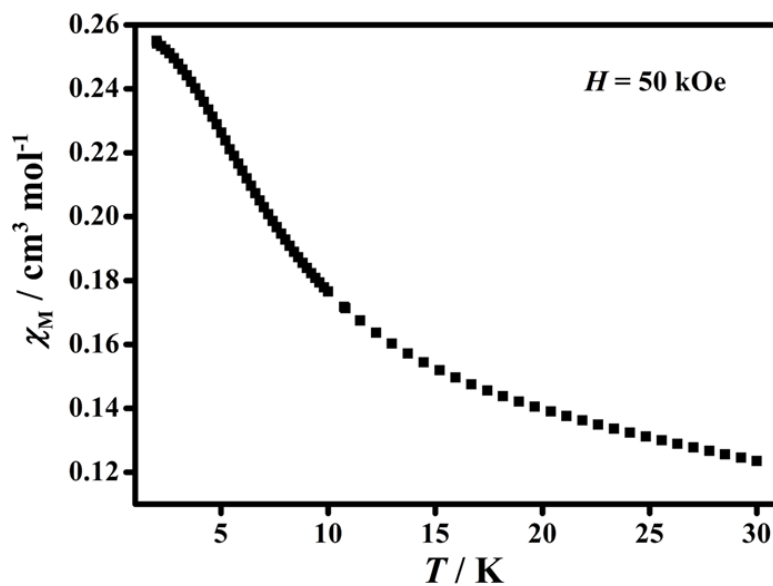

Fig. S8. Temperature dependence of magnetic susceptibilities of **1** at 50 kOe.

## 7. BVS Calculations

The bond valence sum (BVS) calculations have been carried out based on BVS model.<sup>3</sup> In this method, the valence  $\nu_{ij}$  of a bond between two atoms  $i$  and  $j$  can be expressed by an empirical expression (eqn (1)) where  $R_{ij}$  is the length of the bond and  $R_0$  is a parameter characteristic of the bond.



$$v_{ij} = \exp[(R_0 - R_{ij})/0.37] \quad (1)$$

The sum of all valences from a given atom  $i$  with *valence*  $V_i$  obey an empirical expression (eqn (2)).

$$V_i = \sum v_i \quad (2)$$

Table S3. Bond valence values for cobalt centers in **1**.

| Bond type <sup>a</sup> | Bond distance / Å | Bond valence <sup>b</sup> | Bond valence sum |
|------------------------|-------------------|---------------------------|------------------|
| Co1—N1 <sup>#1</sup>   | 2.048(5)          | 0.499                     | 2.226 for Co1    |
| Co1—N4 <sup>#2</sup>   | 2.079(5)          | 0.456                     |                  |
| Co1—N3 <sup>#3</sup>   | 2.091(5)          | 0.443                     |                  |
| Co1—N2                 | 2.156(5)          | 0.370                     |                  |
| Co1—O4 <sup>#3</sup>   | 2.230(4)          | 0.235                     |                  |
| Co1—O2 <sup>#1</sup>   | 2.247(4)          | 0.223                     |                  |
| Co2—N5                 | 2.063(7)          | 0.480                     | 2.104 for Co2    |
| Co2—O5                 | 2.063(7)          | 0.362                     |                  |
| Co2—O3                 | 2.085(4)          | 0.346                     |                  |
| Co2—O3 <sup>#4</sup>   | 2.085(4)          | 0.346                     |                  |
| Co2—O1                 | 2.155 (4)         | 0.285                     |                  |
| Co2—O1 <sup>#4</sup>   | 2.155(4)          | 0.285                     |                  |

<sup>a</sup> #1 -x+1,-y+1,-z+1 #2 x-1/4,-y+1,z-1/4 #3 -x+5/4,-y+5/4,z #4 -x+7/4,-y+3/4,z  
<sup>b</sup>  $R_0(\text{Co-N}) = 1.790 \text{ \AA}$ ;  $R_0(\text{Co-O}) = 1.692 \text{ \AA}$

1. L. E. Hinlel, G. O. Richards and O. Thomas, *J. Chem. Soc.*, 1937. 1432.
2. M. Sheldrick, *Acta Cryst.*, 2008, **A64**, 112.
3. I. D. Brown, *Chem. Rev.*, 2009, **109**, 6858.
